# Supplementary material for: A Multimodal Desorption Electrospray Ionisation Workflow Enabling Visualisation of Lipids and Biologically Relevant Elements in a Single Tissue Section
Source: MDPI journal article supplement (doi:10.3390/metabo13020262), 2023-02-11
Supplement: s1 [file s1]

## A multimodal desorption electrospray ionisation workflow enabling visualisation of lipids and biologically relevant elements in a single tissue section

Catia Costa <sup>1</sup>, Janella De Jesus <sup>2,3</sup>, Chelsea Nikula <sup>3</sup>, Teresa Murta <sup>3</sup>, Geoffrey W. Grime <sup>1</sup>, Vladimir Palitsin <sup>1</sup>,  
Véronique Dartois <sup>4</sup>, Kaya Firat <sup>4</sup>, Roger Webb <sup>1</sup>, Josephine Bunch <sup>3</sup> and Melanie J. Bailey <sup>1,2,\*</sup>

<sup>1</sup> University of Surrey Ion Beam Centre, Guildford GU2 7XH, UK; c.d.costa@surrey.ac.uk (C.C.); g.grime@surrey.ac.uk (G.W.G.); v.palitsin@surrey.ac.uk (V.P.); r.webb@surrey.ac.uk (R.W.)

<sup>2</sup> Department of Chemistry, University of Surrey, Guildford GU2 7XH, UK;  
janella.marie.de.jesus@npl.co.uk

<sup>3</sup> The National Physical Laboratory, Teddington TW11 0LW, UK; c.jnikula@gmail.com (C.N.);  
tigoncalvesmurta@gmail.com (T.M.); josephine.bunch@npl.co.uk (J.B.)

<sup>4</sup> Center for Discovery and Innovation, Hackensack Meridian School of Medicine, Nutley, NJ 07110, USA;  
veronique.dartois@hnh-cdi.org (V.D.); firat.kaya@hnh-cdi.org (K.F.)

\* Correspondence: m.bailey@surrey.ac.uk; Tel.: +44-(0)1483682593

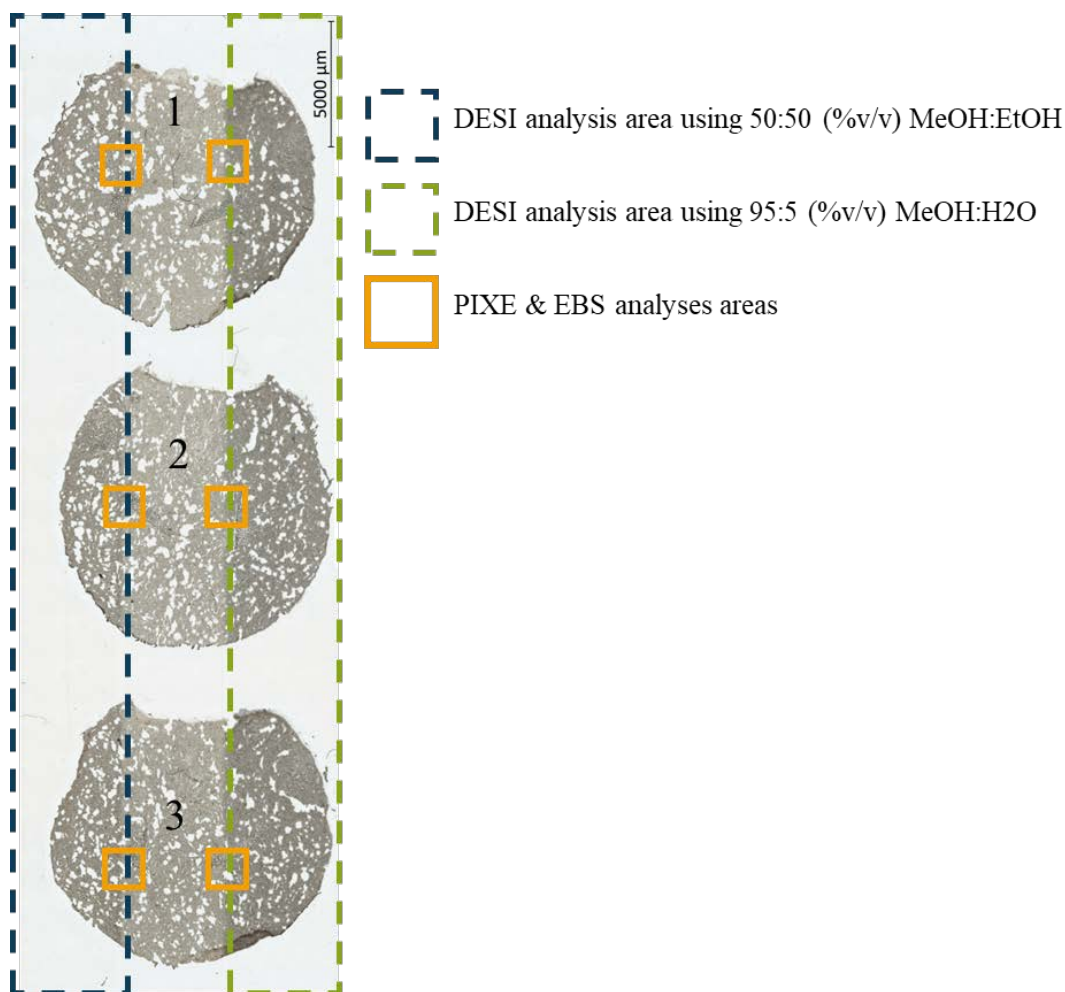

**Figure S1.** Areas analysed by DESI, PIXE & EBS on liver tissue homogenate sections.

(A)

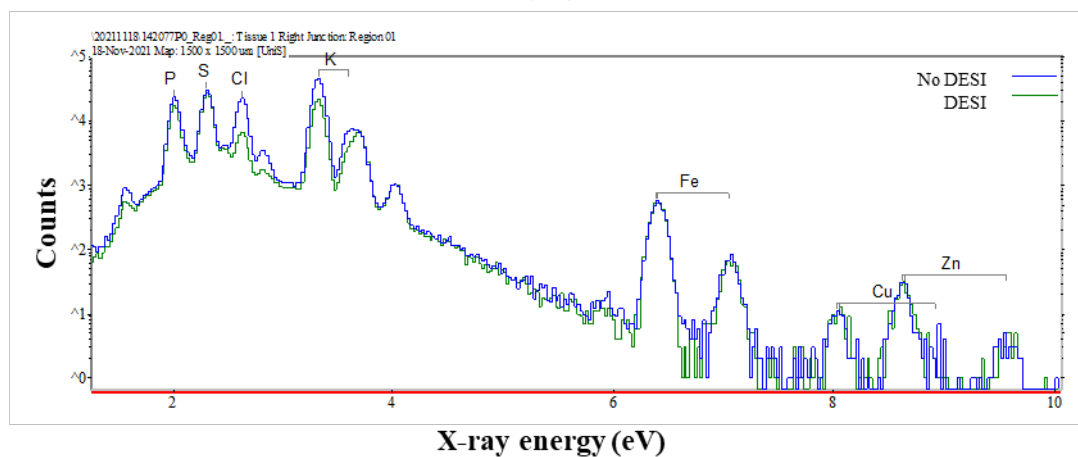

(B)

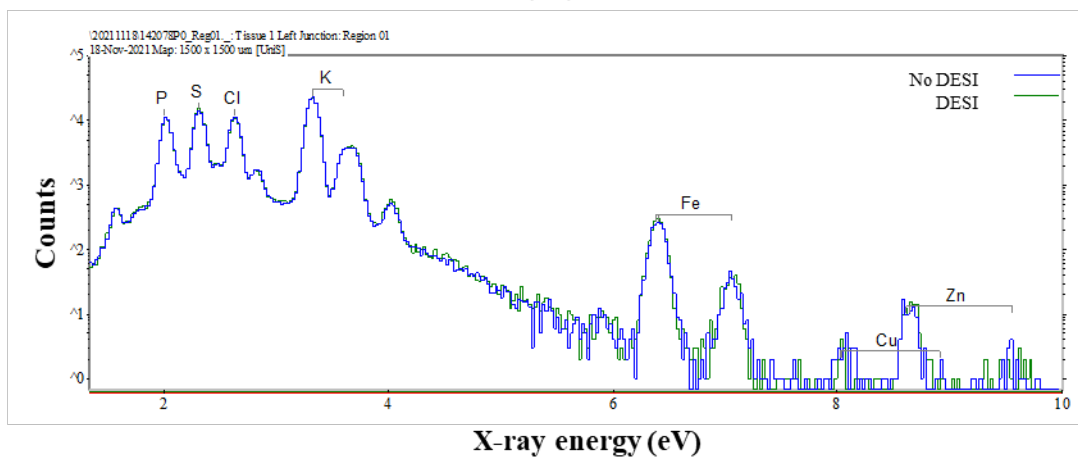

**Figure S2.** Overlay of X-ray spectra taken from regions of interest on areas not analysed (Reg01; blue) and analysed by DESI (Reg02; green) using (A) 95:5 (% v/v) MeOH:H<sub>2</sub>O and (B) 50:50 (% v/v) MeOH:EtOH.

**Table S1.** T-test results between the average (n=3) of the ratios of the elemental peak area measured by PIXE after DESI analysis with two different solvents – MeOH/H<sub>2</sub>O and MeOH/EtOH.

| Table Analyzed                         | P                     | Table Analyzed                         | S                     | Table Analyzed                         | Cl                    |
|----------------------------------------|-----------------------|----------------------------------------|-----------------------|----------------------------------------|-----------------------|
| Column B                               | MeOH/EtOH             | Column B                               | MeOH/EtOH             | Column B                               | MeOH/EtOH             |
| vs.                                    | vs.                   | vs.                                    | vs.                   | vs.                                    | vs.                   |
| Column A                               | MeOH/H <sub>2</sub> O | Column A                               | MeOH/H <sub>2</sub> O | Column A                               | MeOH/H <sub>2</sub> O |
| Unpaired t test                        |                       | Unpaired t test                        |                       | Unpaired t test                        |                       |
| P value                                | 0.0004                | P value                                | 0.0016                | P value                                | <0.0001               |
| P value summary                        | ***                   | P value summary                        | **                    | P value summary                        | ****                  |
| Significantly different (P < 0.05)?    | Yes                   | Significantly different (P < 0.05)?    | Yes                   | Significantly different (P < 0.05)?    | Yes                   |
| One- or two-tailed P value?            | Two-tailed            | One- or two-tailed P value?            | Two-tailed            | One- or two-tailed P value?            | Two-tailed            |
| t, df                                  | t=11.28, df=4         | t, df                                  | t=7.566, df=4         | t, df                                  | t=25.22, df=4         |
| How big is the difference?             |                       | How big is the difference?             |                       | How big is the difference?             |                       |
| Mean of column A                       | 0.6233                | Mean of column A                       | 0.7667                | Mean of column A                       | 0.2567                |
| Mean of column B                       | 1.007                 | Mean of column B                       | 1.087                 | Mean of column B                       | 0.96                  |
| Difference between means (B - A) ± SEM | 0.3833 ± 0.03399      | Difference between means (B - A) ± SEM | 0.3200 ± 0.04230      | Difference between means (B - A) ± SEM | 0.7033 ± 0.02789      |
| 95% confidence interval                | 0.2890 to 0.4777      | 95% confidence interval                | 0.2026 to 0.4374      | 95% confidence interval                | 0.6259 to 0.7808      |
| R squared (eta squared)                | 0.9695                | R squared (eta squared)                | 0.9347                | R squared (eta squared)                | 0.9938                |
| F test to compare variances            |                       | F test to compare variances            |                       | F test to compare variances            |                       |
| F, DFn, Dfd                            | 13.86, 2, 2           | F, DFn, Dfd                            | 39.25, 2, 2           | F, DFn, Dfd                            | 9.000, 2, 2           |
| P value                                | 0.1346                | P value                                | 0.0497                | P value                                | 0.2                   |
| P value summary                        | ns                    | P value summary                        | *                     | P value summary                        | ns                    |
| Significantly different (P < 0.05)?    | No                    | Significantly different (P < 0.05)?    | Yes                   | Significantly different (P < 0.05)?    | No                    |
| Data analyzed                          |                       | Data analyzed                          |                       | Data analyzed                          |                       |
| Sample size, column A                  | 3                     | Sample size, column A                  | 3                     | Sample size, column A                  | 3                     |
| Sample size, column B                  | 3                     | Sample size, column B                  | 3                     | Sample size, column B                  | 3                     |

  

| Table Analyzed                         | K                     | Table Analyzed                         | Fe                    | Table Analyzed                         | Zn                    |
|----------------------------------------|-----------------------|----------------------------------------|-----------------------|----------------------------------------|-----------------------|
| Column B                               | MeOH/EtOH             | Column B                               | MeOH/EtOH             | Column B                               | MeOH/EtOH             |
| vs.                                    | vs.                   | vs.                                    | vs.                   | vs.                                    | vs.                   |
| Column A                               | MeOH/H <sub>2</sub> O | Column A                               | MeOH/H <sub>2</sub> O | Column A                               | MeOH/H <sub>2</sub> O |
| Unpaired t test                        |                       | Unpaired t test                        |                       | Unpaired t test                        |                       |
| P value                                | <0.0001               | P value                                | 0.0067                | P value                                | 0.0232                |
| P value summary                        | ****                  | P value summary                        | **                    | P value summary                        | *                     |
| Significantly different (P < 0.05)?    | Yes                   | Significantly different (P < 0.05)?    | Yes                   | Significantly different (P < 0.05)?    | Yes                   |
| One- or two-tailed P value?            | Two-tailed            | One- or two-tailed P value?            | Two-tailed            | One- or two-tailed P value?            | Two-tailed            |
| t, df                                  | t=21.57, df=4         | t, df                                  | t=5.163, df=4         | t, df                                  | t=3.577, df=4         |
| How big is the difference?             |                       | How big is the difference?             |                       | How big is the difference?             |                       |
| Mean of column A                       | 0.4                   | Mean of column A                       | 0.8067                | Mean of column A                       | 0.87                  |
| Mean of column B                       | 1.027                 | Mean of column B                       | 1.09                  | Mean of column B                       | 1.107                 |
| Difference between means (B - A) ± SEM | 0.6267 ± 0.02906      | Difference between means (B - A) ± SEM | 0.2833 ± 0.05487      | Difference between means (B - A) ± SEM | 0.2367 ± 0.06616      |
| 95% confidence interval                | 0.5460 to 0.7073      | 95% confidence interval                | 0.1310 to 0.4357      | 95% confidence interval                | 0.05296 to 0.4204     |
| R squared (eta squared)                | 0.9915                | R squared (eta squared)                | 0.8695                | R squared (eta squared)                | 0.7618                |
| F test to compare variances            |                       | F test to compare variances            |                       | F test to compare variances            |                       |
| F, DFn, Dfd                            | 7.444, 2, 2           | F, DFn, Dfd                            | 2.430, 2, 2           | F, DFn, Dfd                            | 5.254, 2, 2           |
| P value                                | 0.2368                | P value                                | 0.583                 | P value                                | 0.3198                |
| P value summary                        | ns                    | P value summary                        | ns                    | P value summary                        | ns                    |
| Significantly different (P < 0.05)?    | No                    | Significantly different (P < 0.05)?    | No                    | Significantly different (P < 0.05)?    | No                    |
| Data analyzed                          |                       | Data analyzed                          |                       | Data analyzed                          |                       |
| Sample size, column A                  | 3                     | Sample size, column A                  | 3                     | Sample size, column A                  | 3                     |
| Sample size, column B                  | 3                     | Sample size, column B                  | 3                     | Sample size, column B                  | 3                     |

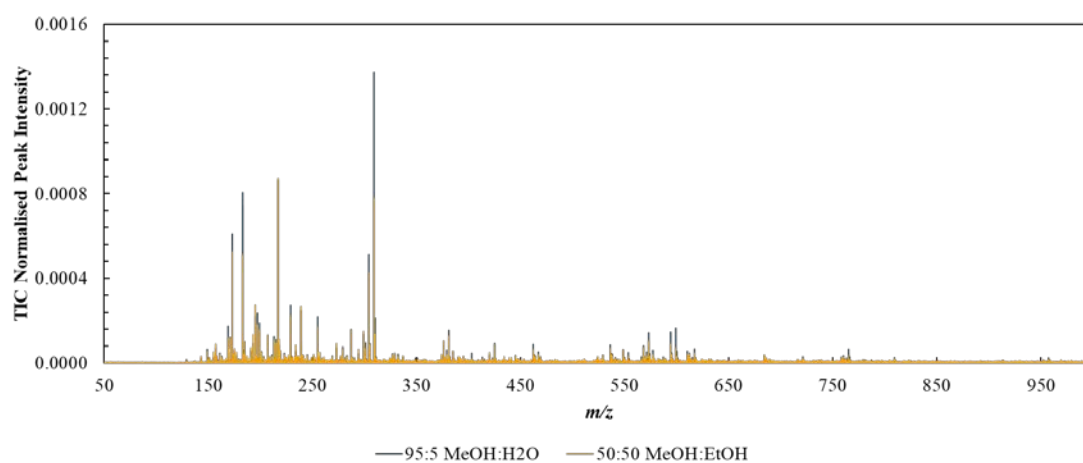

**Figure S3.** Spectra acquired with DESI using the two solvent systems 95:5 (% v/v) methanol/water (top) or 50:50 (% v/v) methanol/ethanol from the background (PET-only).

**Table S2.** Top 50 lipid features, adducts formed and measured  $m/z$  detected using each spray solvent system.

| 95:5 (%v/v) MeOH:H <sub>2</sub> O |                                   |                |
|-----------------------------------|-----------------------------------|----------------|
| Assignment                        | Adduct                            | Measured $m/z$ |
| PC 36:4                           | [M+K] <sup>+</sup>                | 820.538        |
| PC 38:4                           | [M+K] <sup>+</sup>                | 848.568        |
| PC 34:2                           | [M+K] <sup>+</sup>                | 796.534        |
| PC 38:7                           | [M+H] <sup>+</sup>                | 804.562        |
| PC 40:7                           | [M+H] <sup>+</sup>                | 832.592        |
| PC 36:5                           | [M+H] <sup>+</sup>                | 780.560        |
| PC 34:1                           | [M+K] <sup>+</sup>                | 798.550        |
| PC 36:4                           | [M+H] <sup>+</sup>                | 782.574        |
| PC 36:2                           | [M+K] <sup>+</sup>                | 824.566        |
| PA 42:3                           | [M+K] <sup>+</sup>                | 821.542        |
| PG 42:7                           | [M+H] <sup>+</sup>                | 849.570        |
| PC 38:5                           | [M+H] <sup>+</sup>                | 808.592        |
| PC 36:3                           | [M+K] <sup>+</sup>                | 822.546        |
| PA 40:1                           | [M+K] <sup>+</sup>                | 797.540        |
| PC 38:5                           | [M+K] <sup>+</sup>                | 846.548        |
| FA 18:2                           | [M+K] <sup>+</sup>                | 319.226        |
| PC 38:6                           | [M+H] <sup>+</sup>                | 806.572        |
| PC 38:6                           | [M+K] <sup>+</sup>                | 844.536        |
| PC 38:4                           | [M+H] <sup>+</sup>                | 810.606        |
| PA 42:1                           | [M+K] <sup>+</sup>                | 825.572        |
| PA 40:0                           | [M+Na] <sup>+</sup>               | 783.582        |
| PC 38:3                           | [M+K] <sup>+</sup>                | 850.574        |
| PG 38:4                           | [M+H] <sup>+</sup>                | 799.554        |
| PC 38:5                           | [M+Na] <sup>+</sup>               | 830.578        |
| PC 38:6                           | [M+Na] <sup>+</sup>               | 828.552        |
| LPC 16:0                          | [M+K] <sup>+</sup>                | 534.302        |
| FA 20:5                           | [M+H <sub>3</sub> O] <sup>+</sup> | 321.244        |
| PC 36:1                           | [M+K] <sup>+</sup>                | 826.572        |
| PC 34:2                           | [M+H] <sup>+</sup>                | 758.578        |
| PG 40:5                           | [M+Na] <sup>+</sup>               | 847.556        |
| PC 40:6                           | [M+H] <sup>+</sup>                | 834.606        |
| PG 40:6                           | [M+H] <sup>+</sup>                | 823.550        |
| LPC 18:3                          | [M+H] <sup>+</sup>                | 518.328        |
| PC 40:6                           | [M+K] <sup>+</sup>                | 872.564        |
| PC 32:1                           | [M+K] <sup>+</sup>                | 770.516        |
| LPC 20:4                          | [M+K] <sup>+</sup>                | 582.302        |
| PG 40:6                           | [M+Na] <sup>+</sup>               | 845.536        |
| PS 36:1                           | [M+Na] <sup>+</sup>               | 812.542        |

| 50:50 (%v/v) MeOH:EtOH |                                  |                |
|------------------------|----------------------------------|----------------|
| Assignment             | Adduct                           | Measured $m/z$ |
| PC 36:4                | [M+K] <sup>+</sup>               | 820.538        |
| PC 38:4                | [M <sup>+</sup> K] <sup>+</sup>  | 848.568        |
| PC 38:7                | [M <sup>+</sup> H] <sup>+</sup>  | 804.562        |
| PC 40:7                | [M <sup>+</sup> H] <sup>+</sup>  | 832.596        |
| PC 34:2                | [M+K] <sup>+</sup>               | 796.54         |
| PC 36:4                | [M <sup>+</sup> H] <sup>+</sup>  | 782.58         |
| PA 42:3                | [M <sup>+</sup> K] <sup>+</sup>  | 821.542        |
| PC 34:1                | [M <sup>+</sup> K] <sup>+</sup>  | 798.552        |
| PI 32:0                | [M <sup>+</sup> K] <sup>+</sup>  | 849.576        |
| PC 36:2                | [M+K] <sup>+</sup>               | 824.572        |
| PC 38:5                | [M <sup>+</sup> H] <sup>+</sup>  | 808.596        |
| PC 36:3                | [M <sup>+</sup> K] <sup>+</sup>  | 822.55         |
| PA 40:1                | [M <sup>+</sup> K] <sup>+</sup>  | 797.544        |
| PC 38:5                | [M+K] <sup>+</sup>               | 846.554        |
| PC 38:6                | [M <sup>+</sup> H] <sup>+</sup>  | 806.578        |
| PC 38:4                | [M <sup>+</sup> H] <sup>+</sup>  | 810.612        |
| PC 38:5                | [M <sup>+</sup> Na] <sup>+</sup> | 830.578        |
| PC 38:6                | [M <sup>+</sup> K] <sup>+</sup>  | 844.536        |
| PC 38:3                | [M <sup>+</sup> K] <sup>+</sup>  | 850.578        |
| PA 40:0                | [M <sup>+</sup> Na] <sup>+</sup> | 783.582        |
| PC 40:6                | [M <sup>+</sup> H] <sup>+</sup>  | 834.606        |
| PA 42:1                | [M <sup>+</sup> K] <sup>+</sup>  | 825.572        |
| PG 38:4                | [M+H] <sup>+</sup>               | 799.558        |
| PG 40:5                | [M+Na] <sup>+</sup>              | 847.56         |
| PC 36:1                | [M <sup>+</sup> K] <sup>+</sup>  | 826.578        |
| FA 18:2                | [M+K] <sup>+</sup>               | 319.23         |
| PG 40:6                | [M <sup>+</sup> H] <sup>+</sup>  | 823.55         |
| PG 40:6                | [M <sup>+</sup> Na] <sup>+</sup> | 845.542        |
| PA 42:0                | [M <sup>+</sup> Na] <sup>+</sup> | 811.616        |
| LPC 18:3               | [M <sup>+</sup> H] <sup>+</sup>  | 518.33         |
| PC 36:3                | [M <sup>+</sup> H] <sup>+</sup>  | 784.592        |
| PC32:1                 | [M+K] <sup>+</sup>               | 770.522        |
| PC 36:2                | [M <sup>+</sup> H] <sup>+</sup>  | 786.612        |
| PE O-40:6              | [M <sup>+</sup> Na] <sup>+</sup> | 800.556        |
| PC 34:1                | [M <sup>+</sup> H] <sup>+</sup>  | 760.592        |
| FA 20:5                | [M <sup>+</sup> H] <sup>+</sup>  | 303.234        |
| LPC 20:4               | [M <sup>+</sup> Na] <sup>+</sup> | 566.33         |
| LPC 20:3               | [M <sup>+</sup> H] <sup>+</sup>  | 546.362        |

|                  |                     |         |
|------------------|---------------------|---------|
| <b>LPC 18:0</b>  | [M+K] <sup>+</sup>  | 562.334 |
| <b>PC 42:11</b>  | [M+H] <sup>+</sup>  | 852.538 |
| <b>PA 42:0</b>   | [M+Na] <sup>+</sup> | 811.610 |
| <b>PC 40:6</b>   | [M+Na] <sup>+</sup> | 856.584 |
| <b>PS 38:3</b>   | [M+Na] <sup>+</sup> | 836.536 |
| <b>LPC 20:4</b>  | [M+Na] <sup>+</sup> | 566.330 |
| <b>PC 36:3</b>   | [M+H] <sup>+</sup>  | 784.590 |
| <b>PC 42:8</b>   | [M+K] <sup>+</sup>  | 896.558 |
| <b>PE O-40:6</b> | [M+Na] <sup>+</sup> | 800.554 |
| <b>PC 34:1</b>   | [M+H] <sup>+</sup>  | 760.592 |
| <b>LPC 20:3</b>  | [M+H] <sup>+</sup>  | 546.360 |
| <b>PC 36:2</b>   | [M+H] <sup>+</sup>  | 786.610 |

|                 |                                  |         |
|-----------------|----------------------------------|---------|
| <b>PC 34:5</b>  | [M+K] <sup>+</sup>               | 790.548 |
| <b>PG 42:6</b>  | [M <sup>+</sup> H] <sup>+</sup>  | 851.582 |
| <b>LPC 20:4</b> | [M <sup>+</sup> K] <sup>+</sup>  | 582.304 |
| <b>FA 18:1</b>  | [M+K] <sup>+</sup>               | 321.244 |
| <b>LPC 18:0</b> | [M <sup>+</sup> K] <sup>+</sup>  | 562.334 |
| <b>PI 34:2</b>  | [M+K] <sup>+</sup>               | 873.574 |
| <b>PE 38:2</b>  | [M <sup>+</sup> H] <sup>+</sup>  | 772.538 |
| <b>PC 40:5</b>  | [M <sup>+</sup> K] <sup>+</sup>  | 874.58  |
| <b>FA 22:6</b>  | [M <sup>+</sup> K] <sup>+</sup>  | 367.204 |
| <b>FA 20:4</b>  | [M <sup>+</sup> Na] <sup>+</sup> | 327.234 |
| <b>FA 18:2</b>  | [M <sup>+</sup> K] <sup>+</sup>  | 319.208 |
| <b>PE 38:1</b>  | [M <sup>+</sup> K] <sup>+</sup>  | 812.548 |

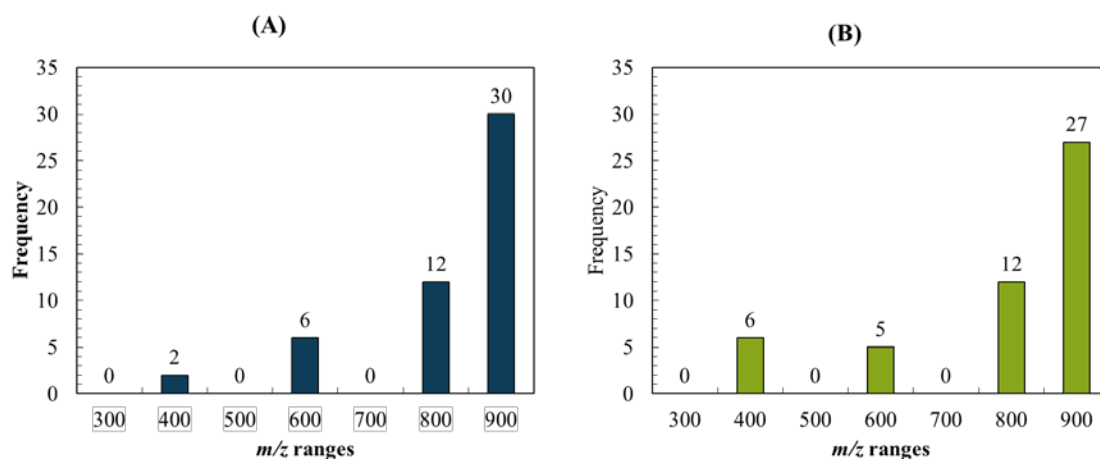

**Figure S4.** Histogram of the number of lipid features in the top 50 detected per  $m/z$  range (bin size 100) for each spray solvent – (A) MeOH/H<sub>2</sub>O and (B) MeOH/EtOH.

**Table S3.** T-test results comparing the measured normalised (to TIC) peak intensities for the top 10 lipids measured using the two solvent systems.

|                            | Discovery? | P value   | Mean of 95:5 (%v/v)<br>MeOH:H <sub>2</sub> O | Mean of 50:50 (%v/v)<br>MeOH:EtOH | Difference | SE of difference | t ratio | df | q value   |
|----------------------------|------------|-----------|----------------------------------------------|-----------------------------------|------------|------------------|---------|----|-----------|
| PC 36:4 [M+K] <sup>+</sup> | Yes        | <0.000001 | 0.01117                                      | 0.01398                           | -0.002816  | 0.0003404        | 8.27    | 16 | <0.000001 |
| PC 38:4 [M+K] <sup>+</sup> | Yes        | <0.000001 | 0.01014                                      | 0.01349                           | -0.003351  | 0.0003131        | 10.7    | 16 | <0.000001 |
| PC 34:2 [M+K] <sup>+</sup> | Yes        | 0.000786  | 0.009648                                     | 0.01054                           | -0.0008878 | 0.000215         | 4.13    | 16 | 0.000893  |
| PC 38:7 [M+H] <sup>+</sup> | Yes        | <0.000001 | 0.007512                                     | 0.01219                           | -0.004677  | 0.0002612        | 17.91   | 16 | <0.000001 |
| PC 40:7 [M+H] <sup>+</sup> | Yes        | <0.000001 | 0.006606                                     | 0.0115                            | -0.004899  | 0.0002348        | 20.86   | 16 | <0.000001 |
| PC 34:1 [M+K] <sup>+</sup> | Yes        | 0.006748  | 0.007                                        | 0.007458                          | -0.0004578 | 0.0001472        | 3.109   | 16 | 0.006816  |
| PC 36:4 [M+H] <sup>+</sup> | Yes        | <0.000001 | 0.006516                                     | 0.008541                          | -0.002026  | 0.0001099        | 18.44   | 16 | <0.000001 |
| PC 36:2 [M+K] <sup>+</sup> | Yes        | 0.000004  | 0.006268                                     | 0.007224                          | -0.0009567 | 0.000139         | 6.884   | 16 | 0.000005  |
| PA 42:3 [M+K] <sup>+</sup> | Yes        | 0.000001  | 0.00551                                      | 0.006727                          | -0.001217  | 0.0001635        | 7.439   | 16 | 0.000002  |

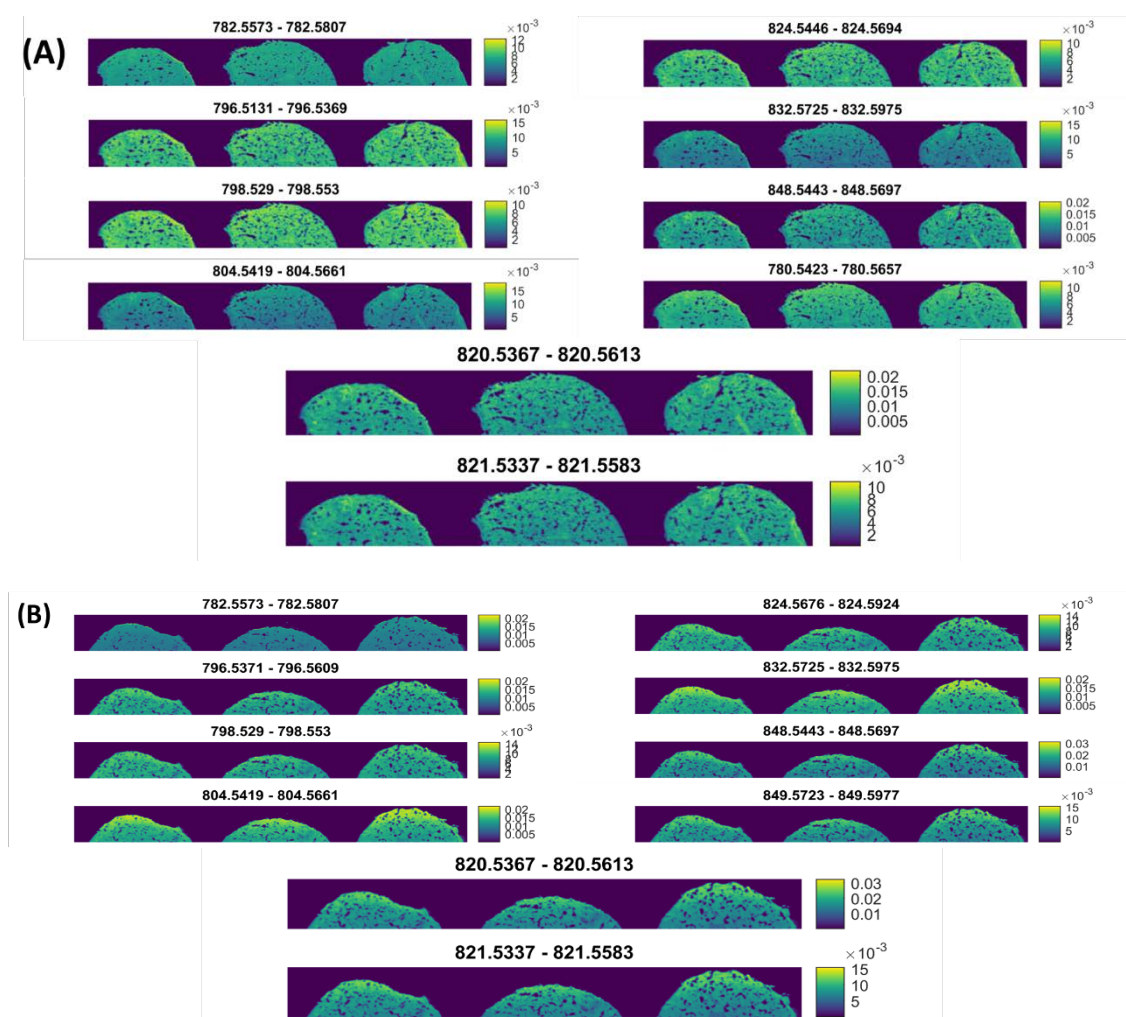

**Figure S5.** Resulting DESI ion maps for the top 10 most abundant lipids imaged using (A) 95:5 (%v/v) MeOH:H<sub>2</sub>O or (B) 50:50 (%v/v) MeOH:EtOH spray solvents on liver tissue homogenates.



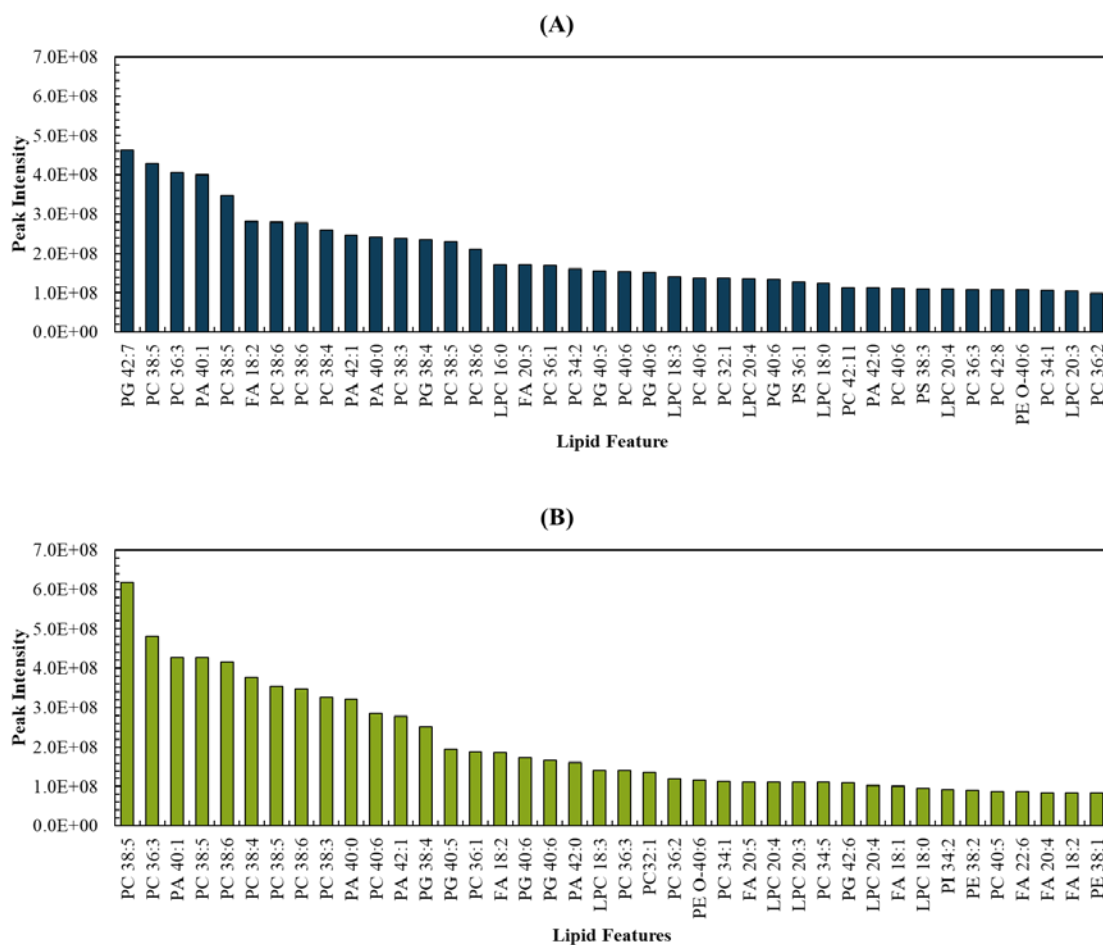

**Figure S6.** Remaining 40 features in the top 50 most intense lipid features and their respective intensities for (A) MeOH:H<sub>2</sub>O and (B) MeOH:EtOH.

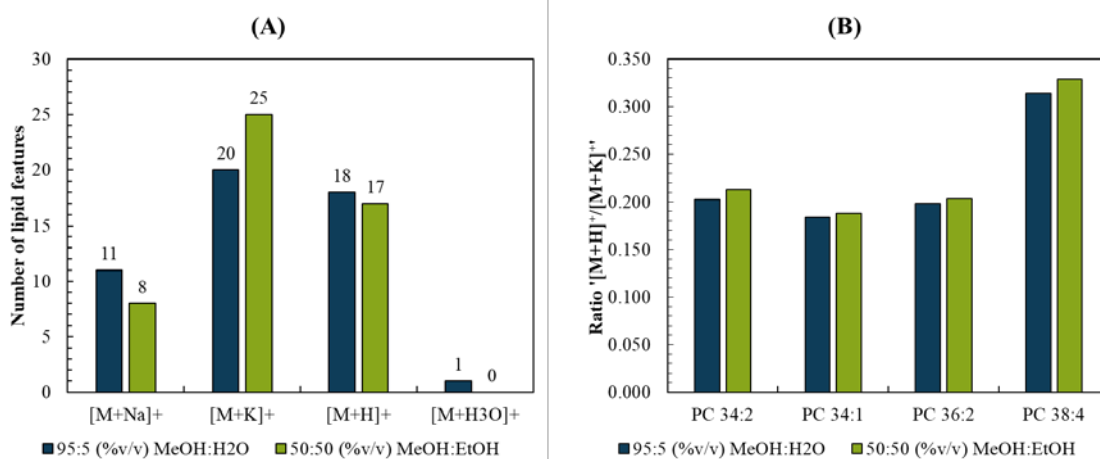

**Figure S7.** (A) Number of lipid features detected in the top 50 lipids with a specific adduct for each of the two solvent mixtures – 95:5 (%v/v) MeOH:H<sub>2</sub>O (blue) and 50:50 (%v/v) MeOH:EtOH (green). (B) Ratio of average (n=9) peak intensities measured for [M+H]<sup>+</sup> and [M+K]<sup>+</sup> ions formed for a selection of PC lipids using the two solvent mixtures – 95:5 (%v/v) MeOH:H<sub>2</sub>O (blue) and 50:50 (%v/v) MeOH:EtOH (green).

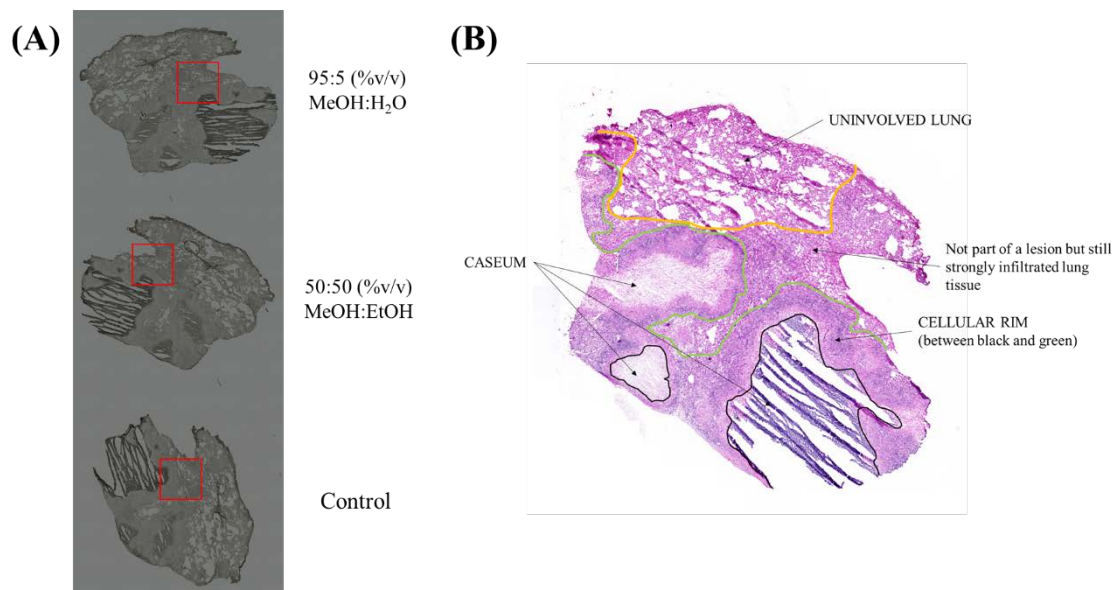

**Figure S8.** (A) Optical images of sequential fresh frozen rabbit lung tissues containing a caseous granuloma (a lesion caused by tuberculosis) showing the regions analysed using ion beam analysis; (B) Hematoxylin and eosin (H&E) stained section and the different regions of the granuloma.

**Table S4.** T-test results of the elemental peak area measured by PIXE from a lung tissue section after DESI analysis with two different solvents – MeOH/H<sub>2</sub>O and MeOH/EtOH.

| Table Analyzed                         | Phosphorus        | Table Analyzed                         | Sulphur        | Table Analyzed                         | Chlorine           | Table Analyzed                         | Potassium          | Table Analyzed                         | Iron           |
|----------------------------------------|-------------------|----------------------------------------|----------------|----------------------------------------|--------------------|----------------------------------------|--------------------|----------------------------------------|----------------|
| Column B                               | MeOH:H2O          | Column B                               | MeOH:H2O       | Column B                               | MeOH:H2O           | Column B                               | MeOH:H2O           | Column B                               | MeOH:H2O       |
| vs.                                    | vs.               | vs.                                    | vs.            | vs.                                    | vs.                | vs.                                    | vs.                | vs.                                    | vs.            |
| Column A                               | Control           | Column A                               | Control        | Column A                               | Control            | Column A                               | Control            | Column A                               | Control        |
| Unpaired t test                        |                   | Unpaired t test                        |                | Unpaired t test                        |                    | Unpaired t test                        |                    | Unpaired t test                        |                |
| P value                                | 0.0042            | P value                                | 0.0641         | P value                                | <0.0001            | P value                                | <0.0001            | P value                                | 0.354          |
| P value summary                        | **                | P value summary                        | ns             | P value summary                        | ****               | P value summary                        | ****               | P value summary                        | ns             |
| Significantly different (P < 0.05)?    | Yes               | Significantly different (P < 0.05)?    | No             | Significantly different (P < 0.05)?    | Yes                | Significantly different (P < 0.05)?    | Yes                | Significantly different (P < 0.05)?    | No             |
| One- or two-tailed P value?            | Two-tailed        | One- or two-tailed P value?            | Two-tailed     | One- or two-tailed P value?            | Two-tailed         | One- or two-tailed P value?            | Two-tailed         | One- or two-tailed P value?            | Two-tailed     |
| t, df                                  | t=4.484, df=6     | t, df                                  | t=2.265, df=6  | t, df                                  | t=9.781, df=6      | t, df                                  | t=11.11, df=6      | t, df                                  | t=1.004, df=6  |
| How big is the difference?             |                   | How big is the difference?             |                | How big is the difference?             |                    | How big is the difference?             |                    | How big is the difference?             |                |
| Mean of column A                       | 169825            | Mean of column A                       | 166966         | Mean of column A                       | 239292             | Mean of column A                       | 327173             | Mean of column A                       | 2756           |
| Mean of column B                       | 103629            | Mean of column B                       | 131636         | Mean of column B                       | 20466              | Mean of column B                       | 90625              | Mean of column B                       | 2233           |
| Difference between means (B - A) ± SEM | -66197 ± 14763    | Difference between means (B - A) ± SEM | -35330 ± 15598 | Difference between means (B - A) ± SEM | -218826 ± 22373    | Difference between means (B - A) ± SEM | -236548 ± 21288    | Difference between means (B - A) ± SEM | -523.1 ± 520.8 |
| 95% confidence interval                | -102321 to -30073 | 95% confidence interval                | -73496 to 2836 | 95% confidence interval                | -273572 to -164081 | 95% confidence interval                | -288637 to -184459 | 95% confidence interval                | -1797 to 751.2 |
| R squared (eta squared)                | 0.7702            | R squared (eta squared)                | 0.4609         | R squared (eta squared)                | 0.941              | R squared (eta squared)                | 0.9537             | R squared (eta squared)                | 0.1439         |
| F test to compare variances            |                   | F test to compare variances            |                | F test to compare variances            |                    | F test to compare variances            |                    | F test to compare variances            |                |
| F, DFn, Dfd                            | 1.472, 3, 3       | F, DFn, Dfd                            | 2.191, 3, 3    | F, DFn, Dfd                            | 737.9, 3, 3        | F, DFn, Dfd                            | 7.637, 3, 3        | F, DFn, Dfd                            | 13.91, 3, 3    |
| P value                                | 0.7585            | P value                                | 0.536          | P value                                | 0.0002             | P value                                | 0.129              | P value                                | 0.0578         |
| P value summary                        | ns                | P value summary                        | ns             | P value summary                        | ***                | P value summary                        | ns                 | P value summary                        | ns             |
| Significantly different (P < 0.05)?    | No                | Significantly different (P < 0.05)?    | No             | Significantly different (P < 0.05)?    | Yes                | Significantly different (P < 0.05)?    | No                 | Significantly different (P < 0.05)?    | No             |
| Data analyzed                          |                   | Data analyzed                          |                | Data analyzed                          |                    | Data analyzed                          |                    | Data analyzed                          |                |
| Sample size, column A                  | 4                 | Sample size, column A                  | 4              | Sample size, column A                  | 4                  | Sample size, column A                  | 4                  | Sample size, column A                  | 4              |
| Sample size, column B                  | 4                 | Sample size, column B                  | 4              | Sample size, column B                  | 4                  | Sample size, column B                  | 4                  | Sample size, column B                  | 4              |

  

| Table Analyzed                         | Phosphorus     | Table Analyzed                         | Sulphur         | Table Analyzed                         | Chlorine         | Table Analyzed                         | Potassium        | Table Analyzed                         | Iron           |
|----------------------------------------|----------------|----------------------------------------|-----------------|----------------------------------------|------------------|----------------------------------------|------------------|----------------------------------------|----------------|
| Column C                               | MeOH:EtOH      | Column C                               | MeOH:EtOH       | Column C                               | MeOH:EtOH        | Column C                               | MeOH:EtOH        | Column C                               | MeOH:EtOH      |
| vs.                                    | vs.            | vs.                                    | vs.             | vs.                                    | vs.              | vs.                                    | vs.              | vs.                                    | vs.            |
| Column A                               | Control        | Column A                               | Control         | Column A                               | Control          | Column A                               | Control          | Column A                               | Control        |
| Unpaired t test                        |                | Unpaired t test                        |                 | Unpaired t test                        |                  | Unpaired t test                        |                  | Unpaired t test                        |                |
| P value                                | 0.0556         | P value                                | 0.3721          | P value                                | 0.2547           | P value                                | 0.1484           | P value                                | 0.3264         |
| P value summary                        | ns             | P value summary                        | ns              | P value summary                        | ns               | P value summary                        | ns               | P value summary                        | ns             |
| Significantly different (P < 0.05)?    | No             | Significantly different (P < 0.05)?    | No              | Significantly different (P < 0.05)?    | No               | Significantly different (P < 0.05)?    | No               | Significantly different (P < 0.05)?    | No             |
| One- or two-tailed P value?            | Two-tailed     | One- or two-tailed P value?            | Two-tailed      | One- or two-tailed P value?            | Two-tailed       | One- or two-tailed P value?            | Two-tailed       | One- or two-tailed P value?            | Two-tailed     |
| t, df                                  | t=2.369, df=6  | t, df                                  | t=0.9643, df=6  | t, df                                  | t=1.259, df=6    | t, df                                  | t=1.658, df=6    | t, df                                  | t=1.068, df=6  |
| How big is the difference?             |                | How big is the difference?             |                 | How big is the difference?             |                  | How big is the difference?             |                  | How big is the difference?             |                |
| Mean of column A                       | 169825         | Mean of column A                       | 166966          | Mean of column A                       | 239292           | Mean of column A                       | 327173           | Mean of column A                       | 2756           |
| Mean of column C                       | 121313         | Mean of column C                       | 146604          | Mean of column C                       | 195866           | Mean of column C                       | 259388           | Mean of column C                       | 2127           |
| Difference between means (C - A) ± SEM | -48512 ± 20475 | Difference between means (C - A) ± SEM | -20362 ± 21115  | Difference between means (C - A) ± SEM | -43427 ± 34487   | Difference between means (C - A) ± SEM | -67785 ± 40881   | Difference between means (C - A) ± SEM | -629.8 ± 589.4 |
| 95% confidence interval                | -98613 to 1588 | 95% confidence interval                | -72029 to 31306 | 95% confidence interval                | -127814 to 40961 | 95% confidence interval                | -167818 to 32248 | 95% confidence interval                | -2072 to 812.5 |
| R squared (eta squared)                | 0.4834         | R squared (eta squared)                | 0.1342          | R squared (eta squared)                | 0.209            | R squared (eta squared)                | 0.3142           | R squared (eta squared)                | 0.1599         |
| F test to compare variances            |                | F test to compare variances            |                 | F test to compare variances            |                  | F test to compare variances            |                  | F test to compare variances            |                |
| F, DFn, Dfd                            | 2.231, 3, 3    | F, DFn, Dfd                            | 4.848, 3, 3     | F, DFn, Dfd                            | 1.379, 3, 3      | F, DFn, Dfd                            | 3.171, 3, 3      | F, DFn, Dfd                            | 2.680, 3, 3    |
| P value                                | 0.527          | P value                                | 0.2273          | P value                                | 0.7979           | P value                                | 0.3686           | P value                                | 0.4396         |
| P value summary                        | ns             | P value summary                        | ns              | P value summary                        | ns               | P value summary                        | ns               | P value summary                        | ns             |
| Significantly different (P < 0.05)?    | No             | Significantly different (P < 0.05)?    | No              | Significantly different (P < 0.05)?    | No               | Significantly different (P < 0.05)?    | No               | Significantly different (P < 0.05)?    | No             |
| Data analyzed                          |                | Data analyzed                          |                 | Data analyzed                          |                  | Data analyzed                          |                  | Data analyzed                          |                |
| Sample size, column A                  | 4              | Sample size, column A                  | 4               | Sample size, column A                  | 4                | Sample size, column A                  | 4                | Sample size, column A                  | 4              |
| Sample size, column C                  | 4              | Sample size, column C                  | 4               | Sample size, column C                  | 4                | Sample size, column C                  | 4                | Sample size, column C                  | 4              |

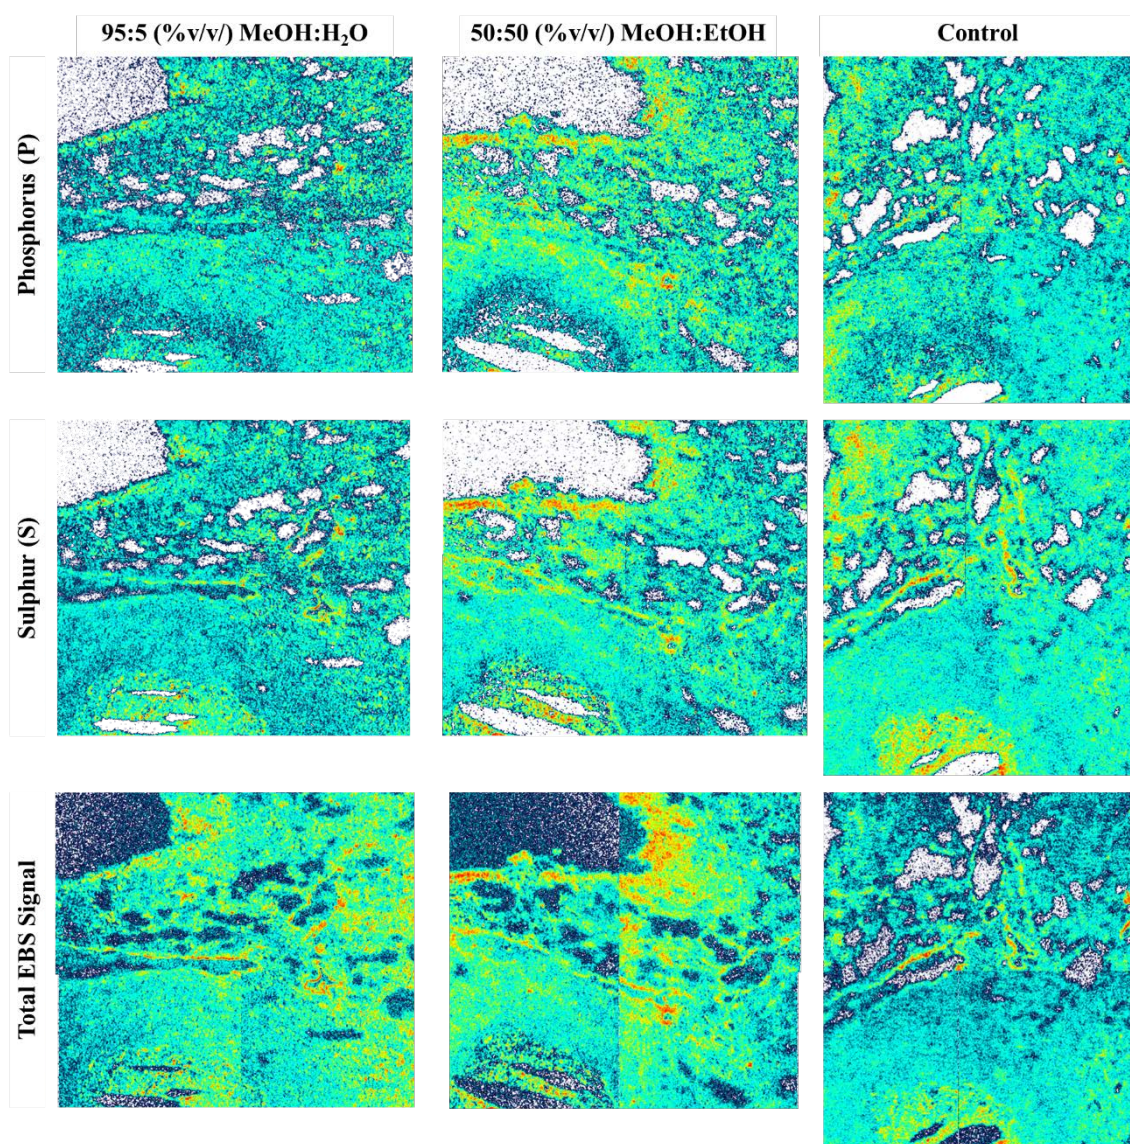

**Figure S9.** Phosphorus (P), sulphur (S) PIXE maps and total EBS maps taken from fresh frozen lung tissue sections after DESI analysis using 95:5 (%v/v) MeOH:H<sub>2</sub>O or 50:50 (%v/v) MeOH:EtOH. A third section (Control) was also analysed – no DESI measurements were taken on this sample.

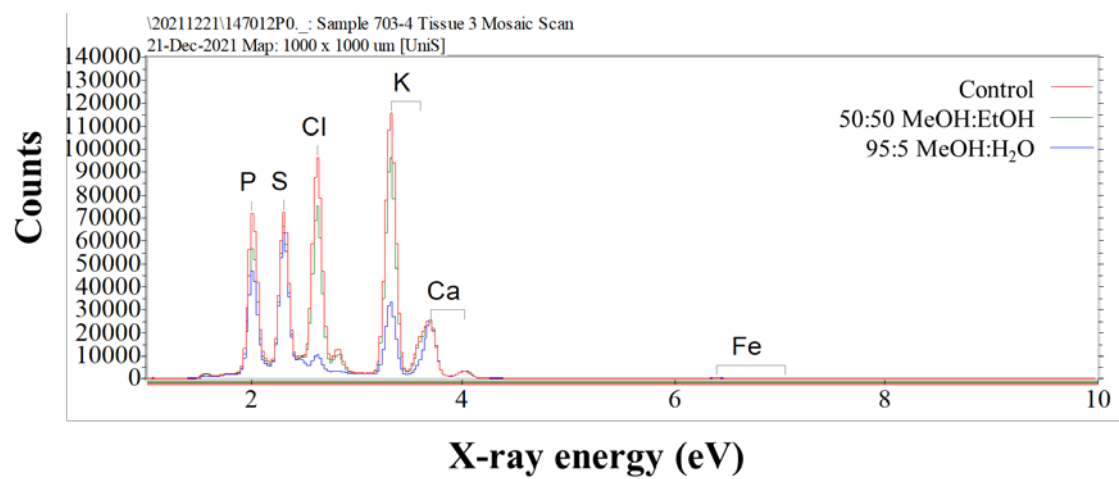

**Figure S10.** Overlay of the X-ray spectra taken from the squares containing the caseum in each of the lung tissue section samples.
